# Supplementary material for: Rainfall disaggregation for hydrological modeling: is there a need for spatial consistence?
Source: Copernicus journal article supplement (doi:10.5194/hess-22-5259-2018), 2018-10-15

### Probability of occurrence

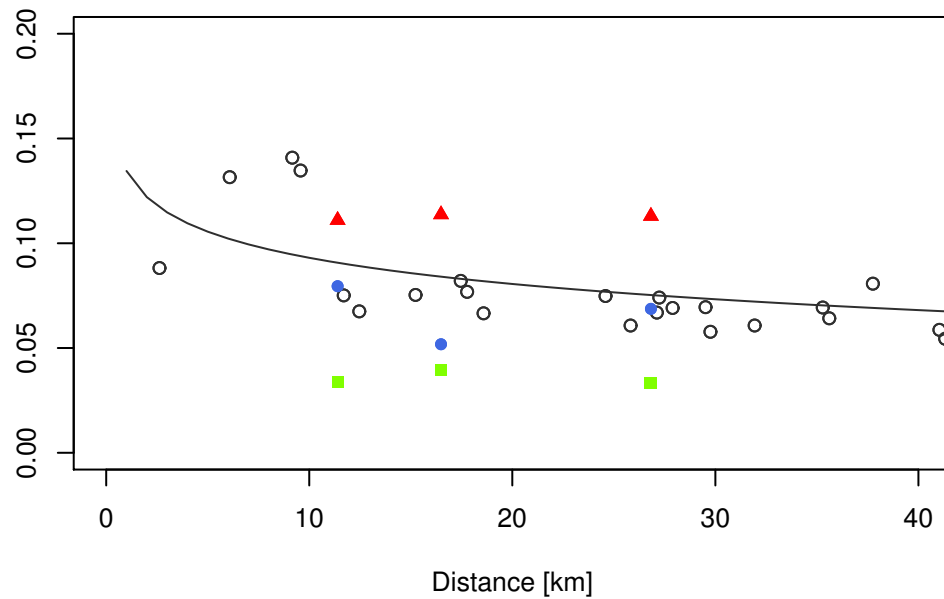

### Continuity ratio

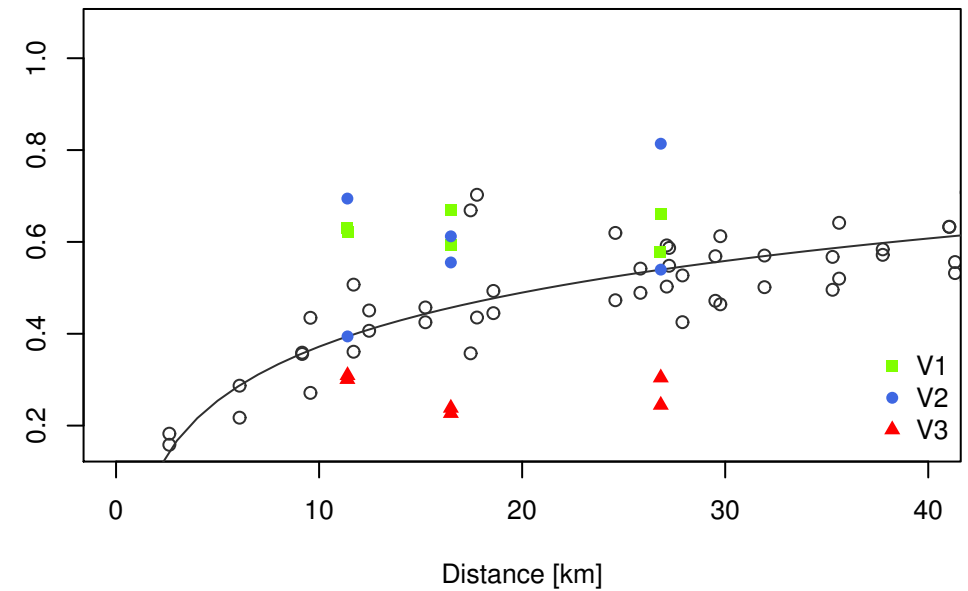

### Coefficient of correlation ( $\leq 4$ mm)

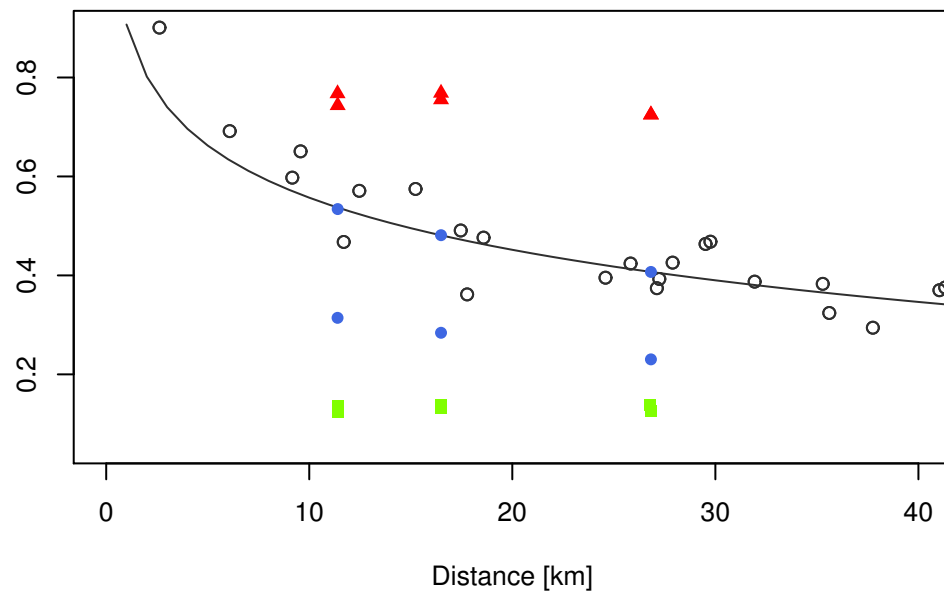

### Coefficient of correlation ( $> 4$ mm)

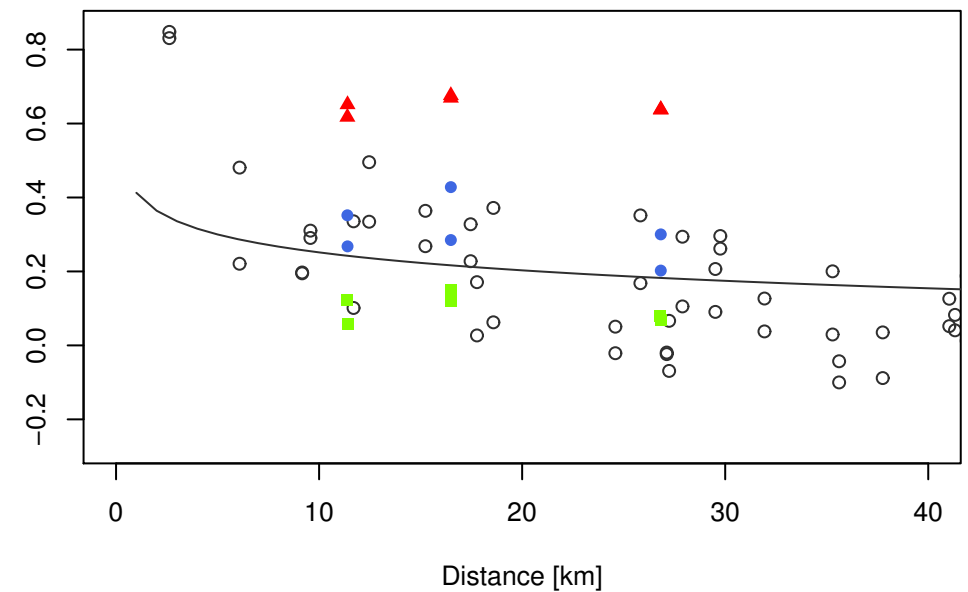

Supplement: Supplementary file 1 [file hess-22-5259-2018-supplement.zip]
