# Supplementary material for: Rainfall disaggregation for hydrological modeling: is there a need for spatial consistence?
Source: Copernicus journal article supplement (doi:10.5194/hess-22-5259-2018), 2018-10-15
Supplement: Supplementary file 2 [file hess-22-5259-2018-supplement.zip]

Archive with 6 entries (6 files):
- Fig-S3.pdf
- Fig-S1.jpg
- Fig-S4.pdf
- hess-22-5259-2018-supplement-title-page.pdf
- Fig-S5.pdf
- Supplement.docx
