# Supplementary material for: Rainfall disaggregation for hydrological modeling: is there a need for spatial consistence?
Source: Copernicus journal article supplement (doi:10.5194/hess-22-5259-2018), 2018-10-15
Supplement: Supplementary file 2 [file hess-22-5259-2018-supplement.zip › hess-22-5259-2018-supplement-title-page.pdf]

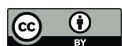

## *Supplement of*

# **Rainfall disaggregation for hydrological modeling: is there a need for spatial consistence?**

**H. Müller-Thomy et al.**

*Correspondence to:* Hannes Müller-Thomy ([mueller-thomy@hydro.tuwien.ac.at](mailto:mueller-thomy@hydro.tuwien.ac.at))

- [hess-22-5259-2018-supplement-title-page.pdf](#)
- [Fig-S1.jpg](#)
- [Fig-S3.pdf](#)
- [Fig-S4.pdf](#)
- [Fig-S5.pdf](#)
- [Supplement.docx](#)

The copyright of individual parts of the supplement might differ from the CC BY 4.0 License.
