# Supplementary figures and images for: Rainfall disaggregation for hydrological modeling: is there a need for spatial consistence?
Source: Copernicus journal article supplement (doi:10.5194/hess-22-5259-2018), 2018-10-15

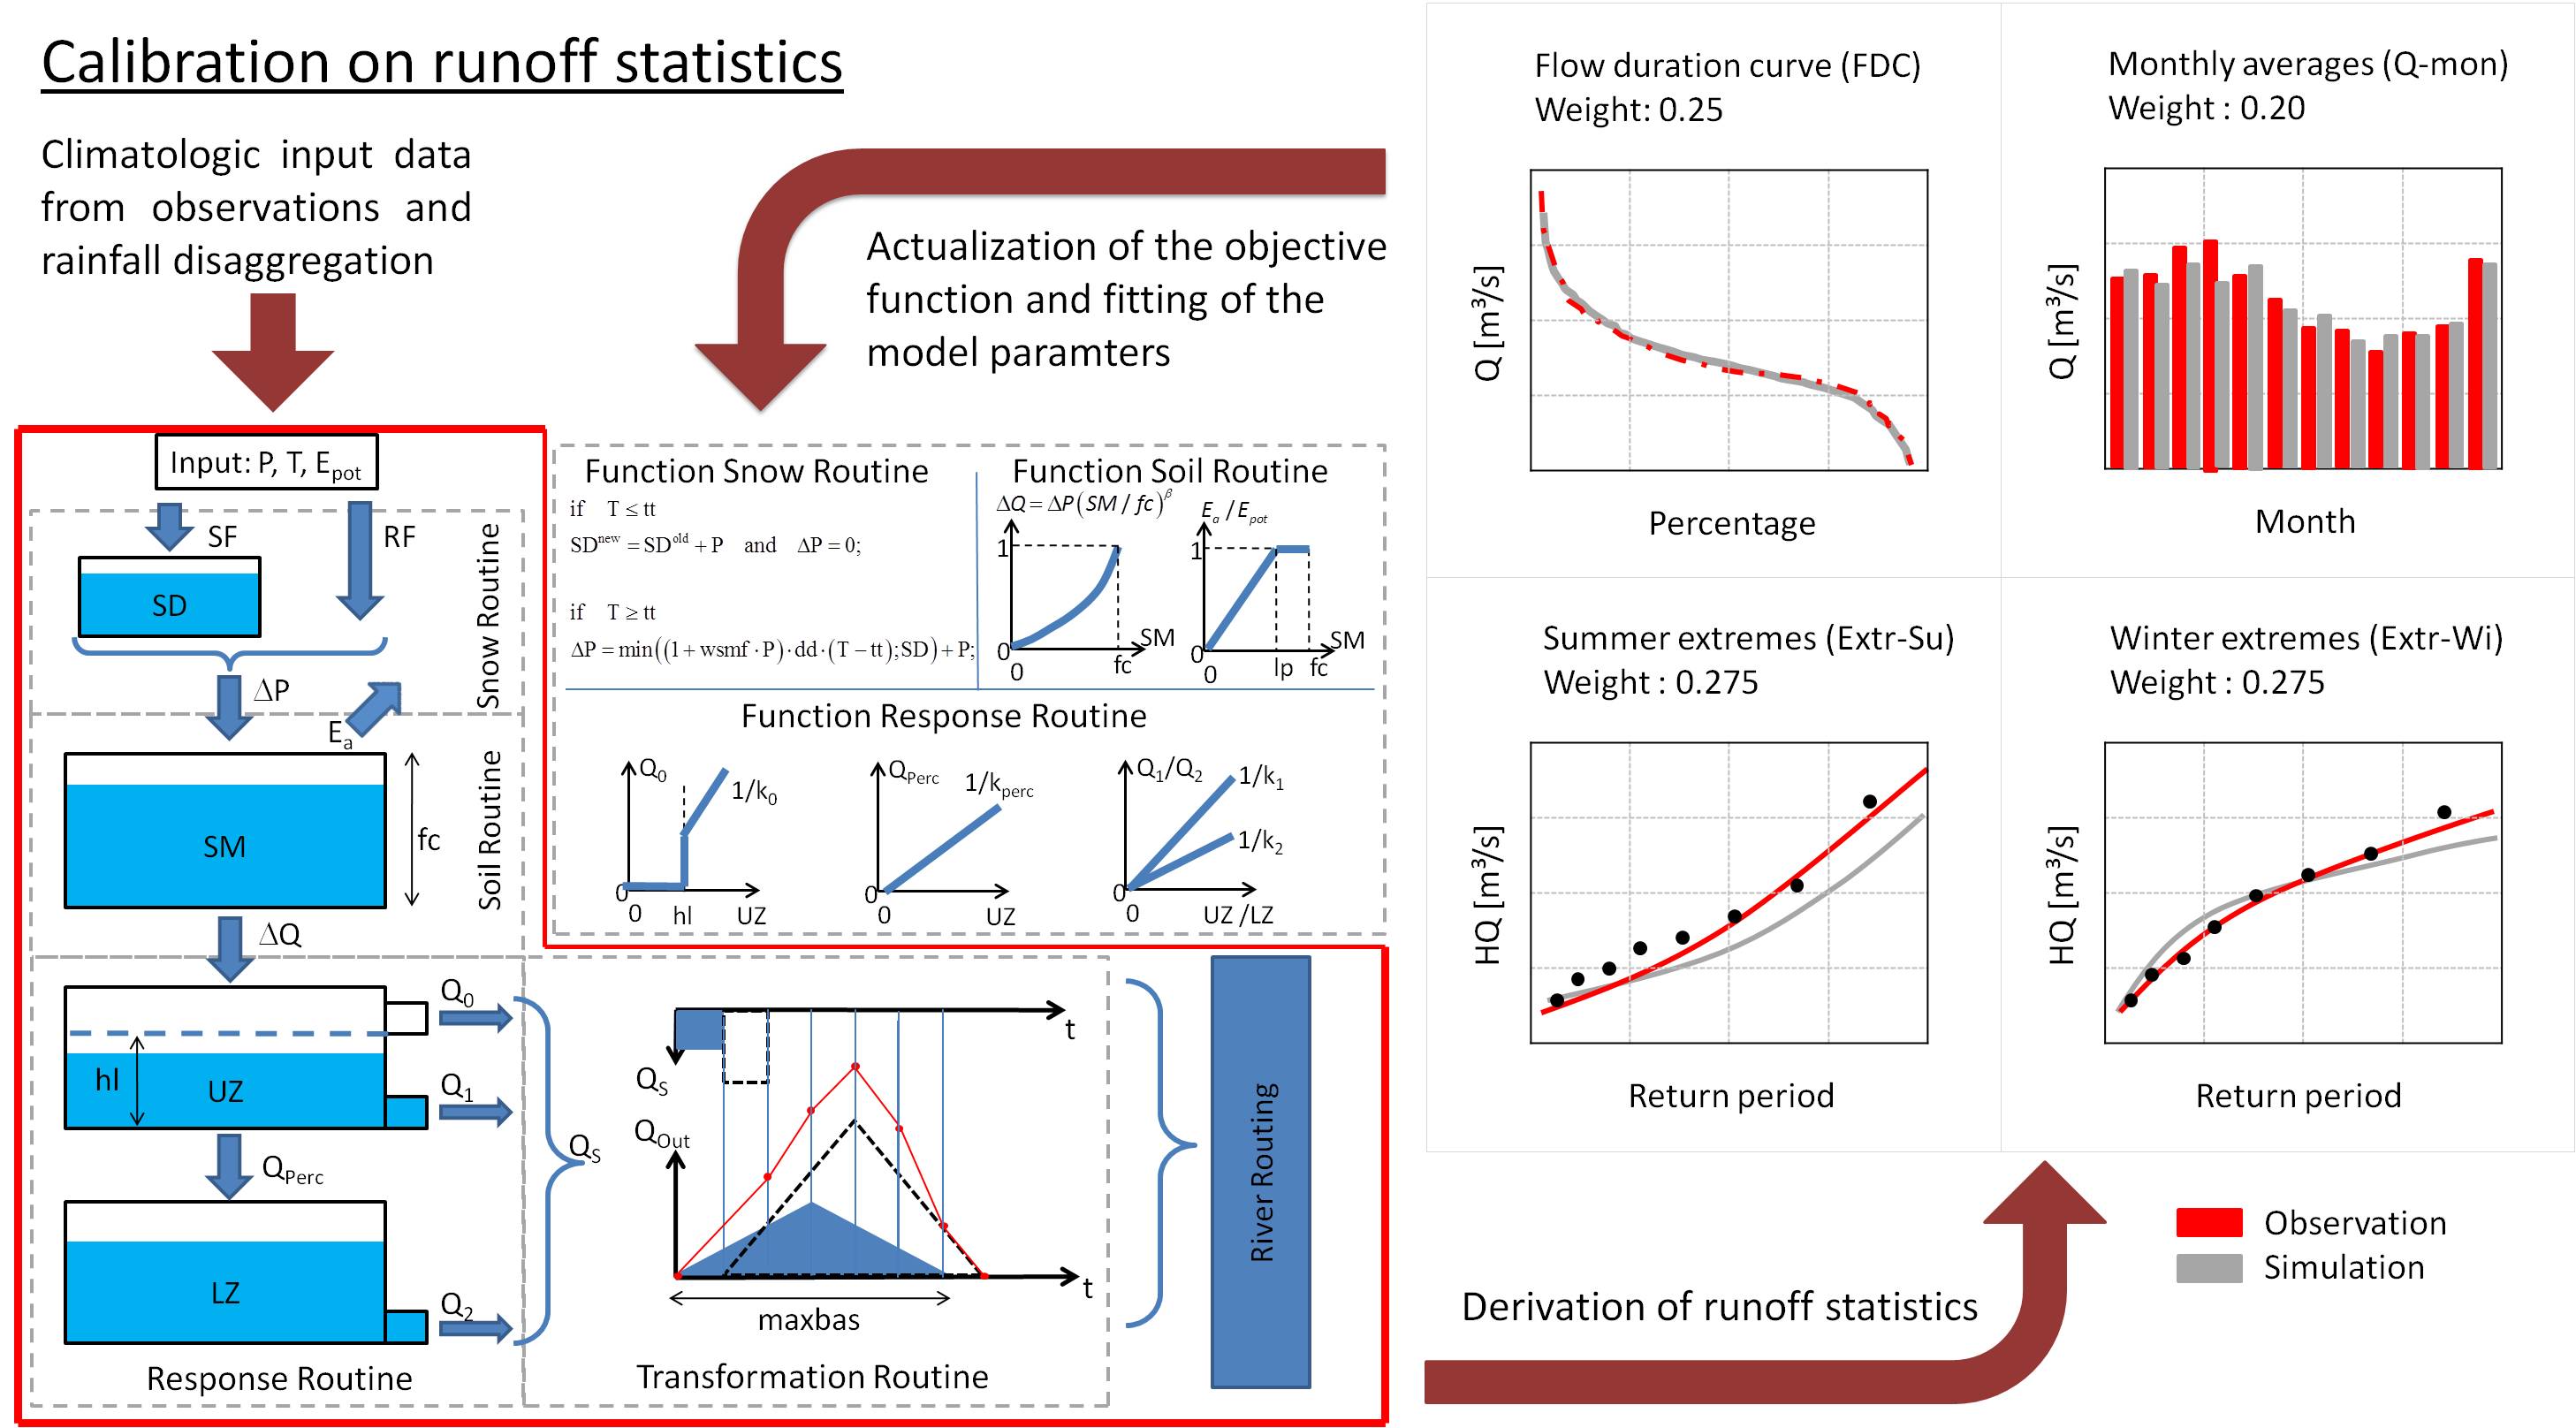

Supplement: Supplementary file 2 [file hess-22-5259-2018-supplement.zip › Fig-S1.jpg]

## Pionierbrücke – Subcatchment 1

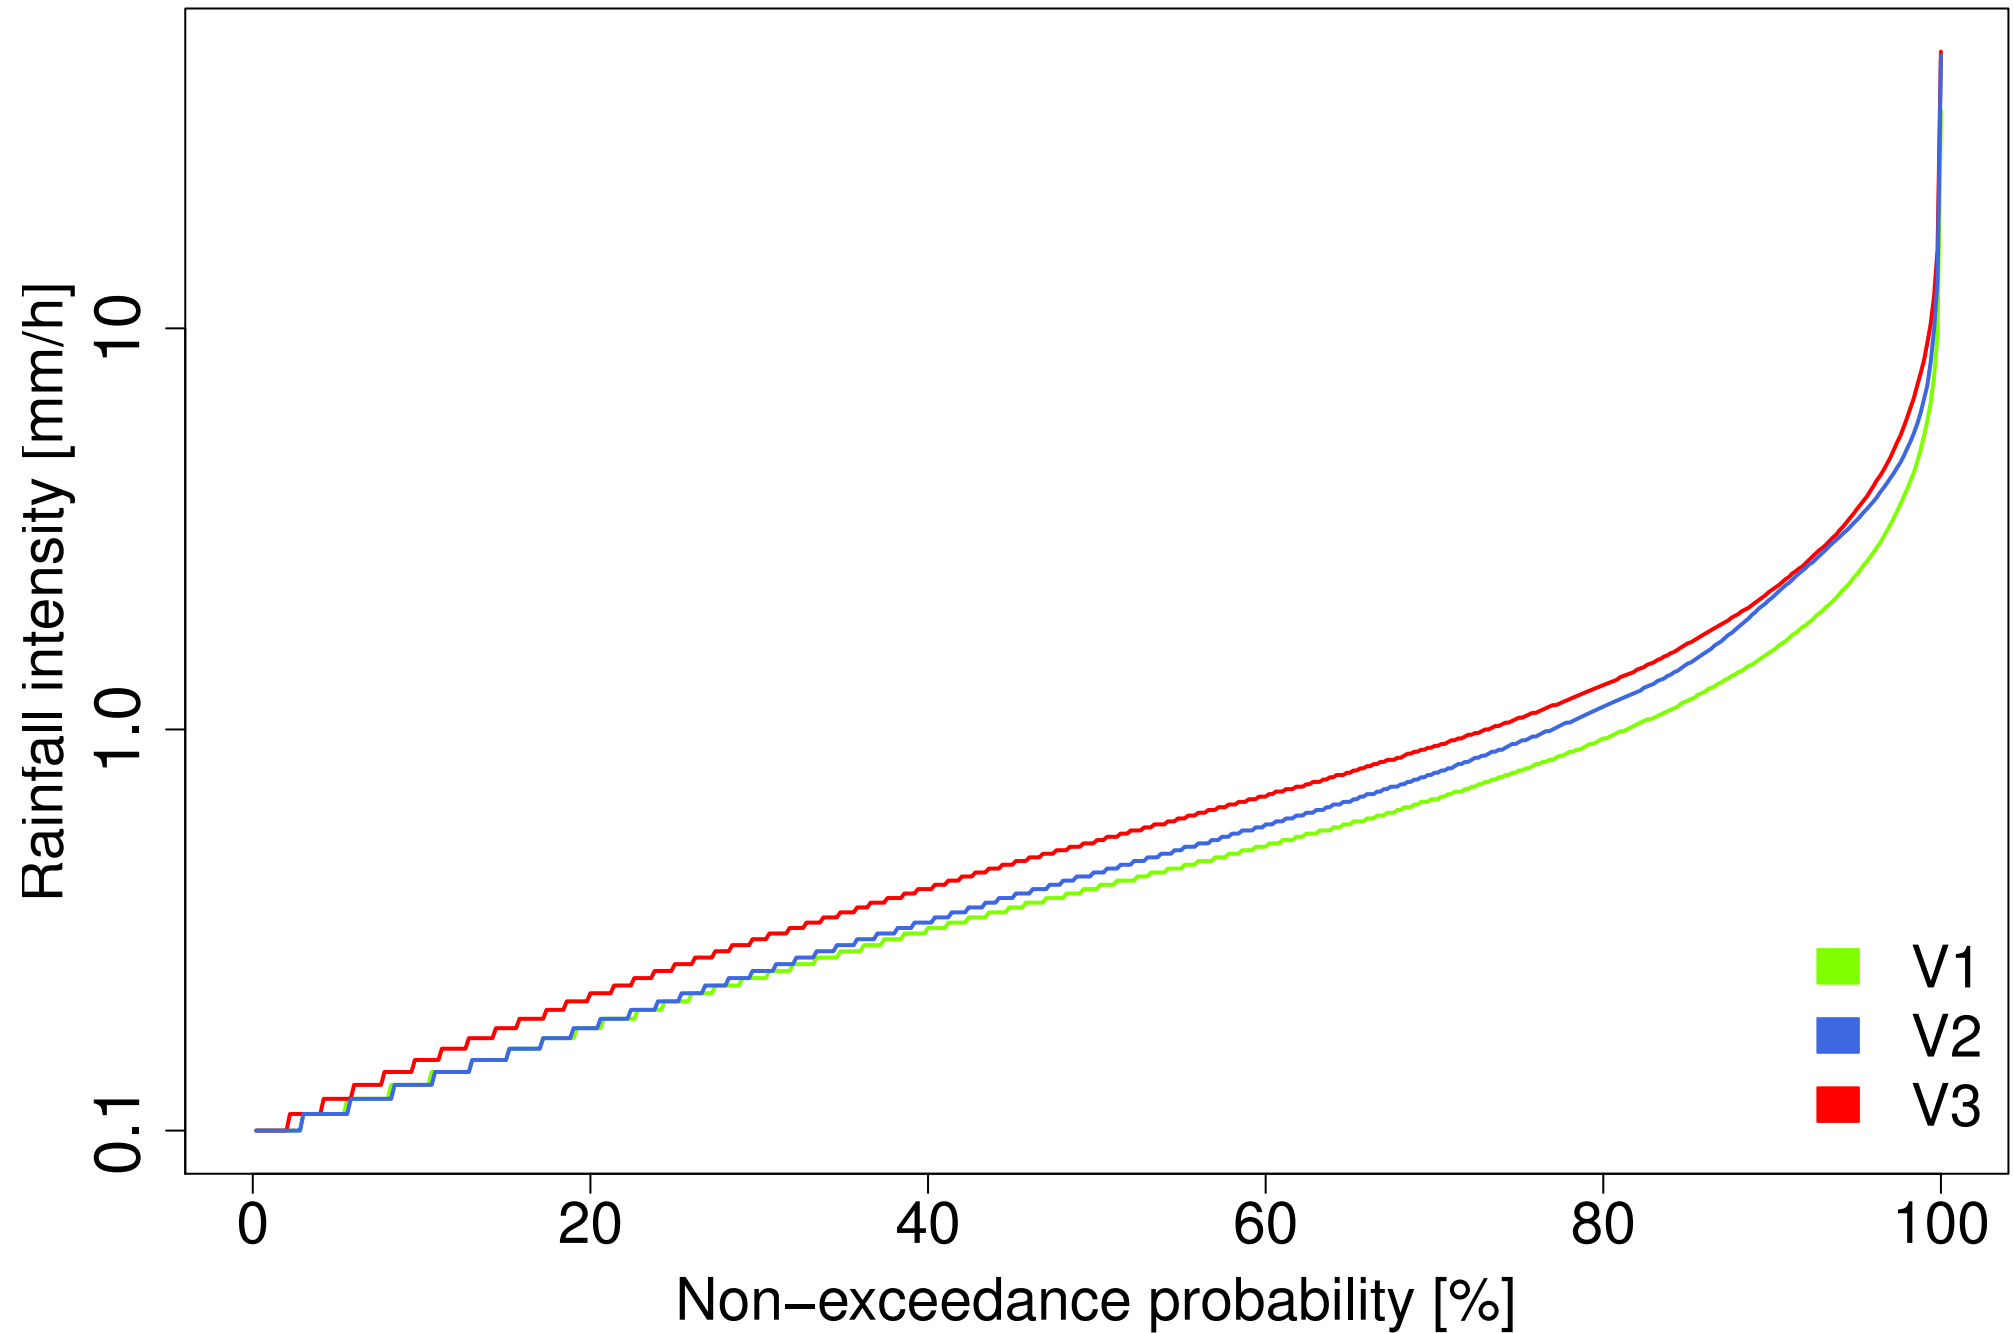

Supplement: Supplementary file 2 [file hess-22-5259-2018-supplement.zip › Fig-S5.pdf]
